# Supplementary material for: Adaptation and Cryptic Pseudogenization in Penguin Toll-Like Receptors
Source: PubMed Central journal article supplement (PMC8788240; doi:10.1093/molbev/msab354), 2021-12-13
Supplement: msab354_supplementary_data.pdf [file msab354_supplementary_data.pdf]

Supplementary information for:

Fiddaman, et al. (2021) Adaptation and cryptic pseudogenization in penguin Toll-like receptors

TLR1B

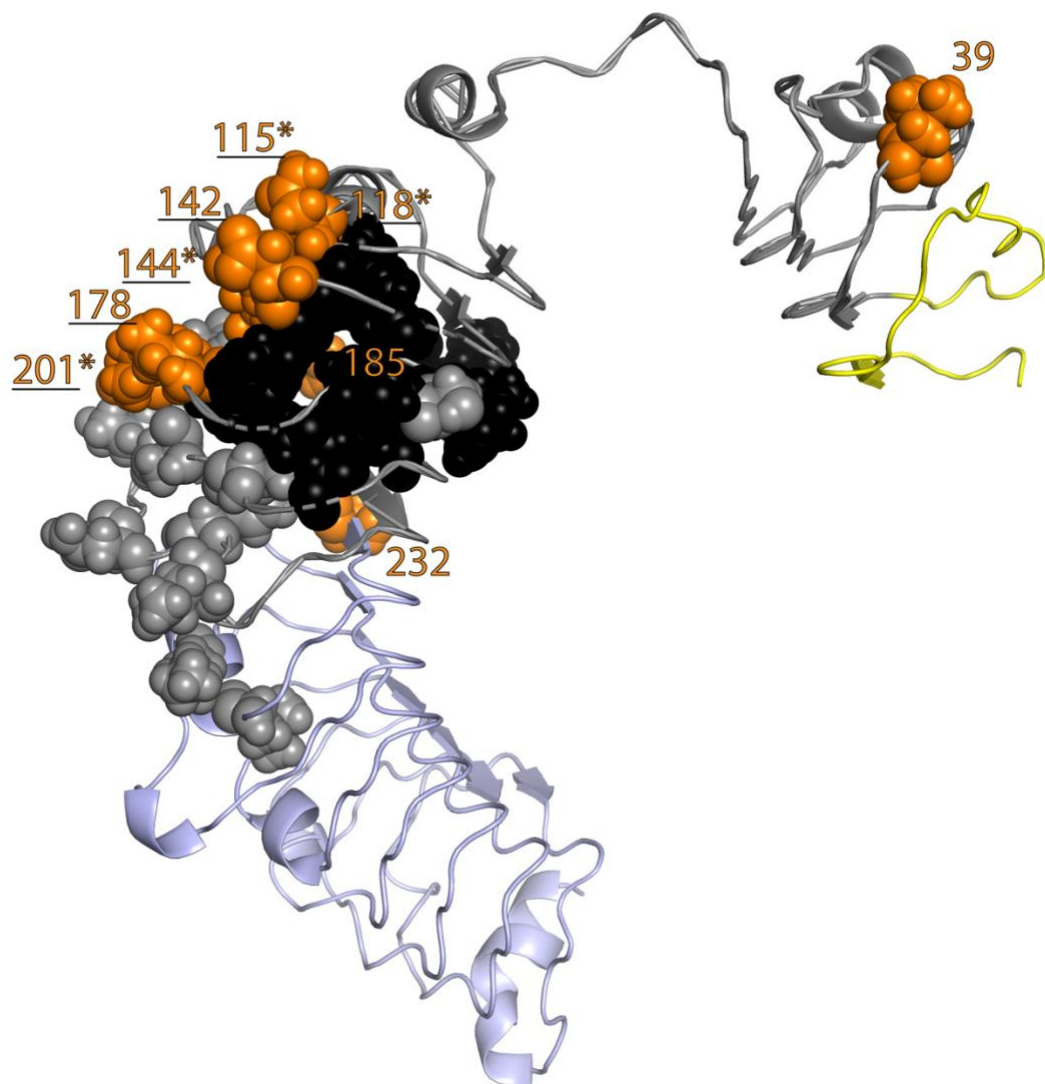

Supplementary Figure S1. Homology models of TLRs showing positions of positively selected sites. Legend is the same as Figure 4 of the main manuscript.

TLR2B

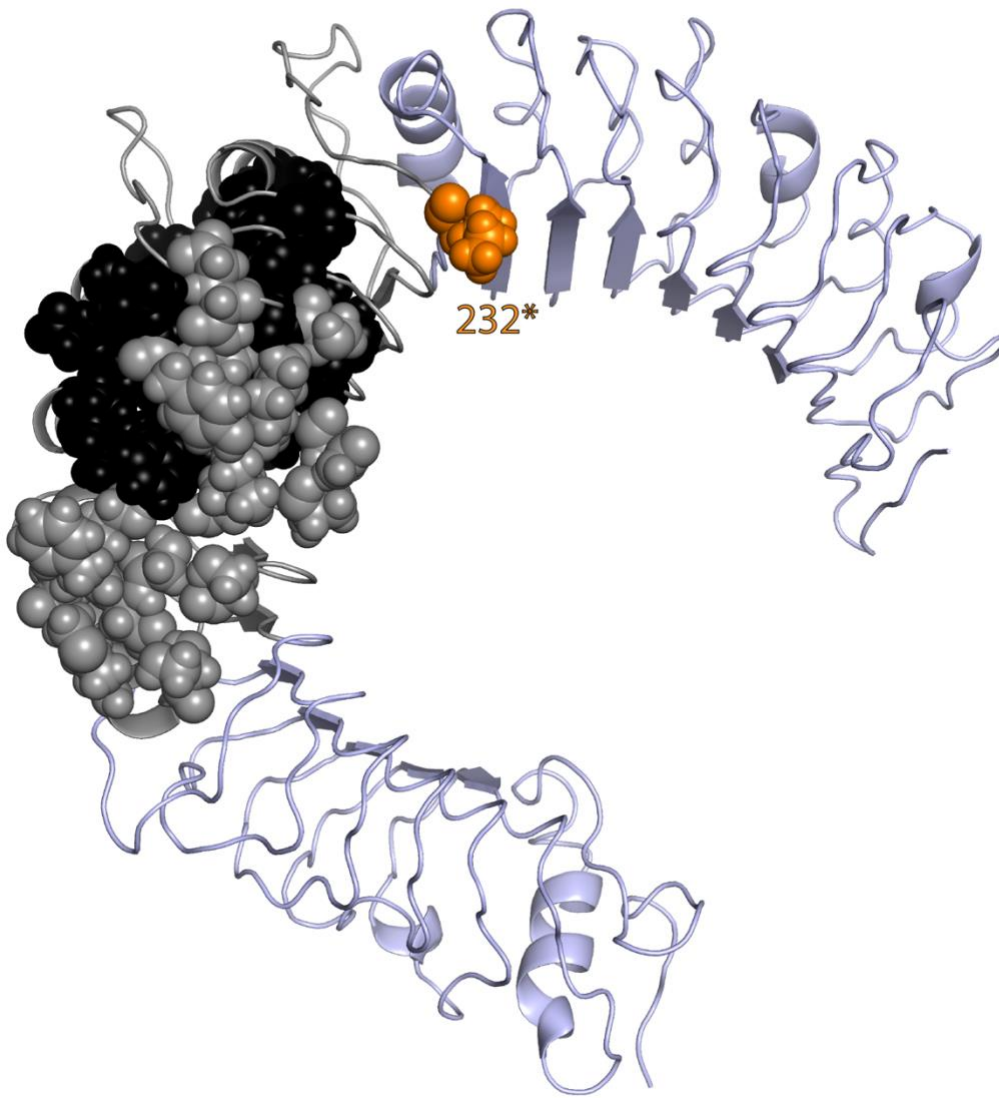

Supplementary Figure S1. Homology models of TLRs showing positions of positively selected sites. Legend is the same as Figure 4 of the main manuscript.

TLR4

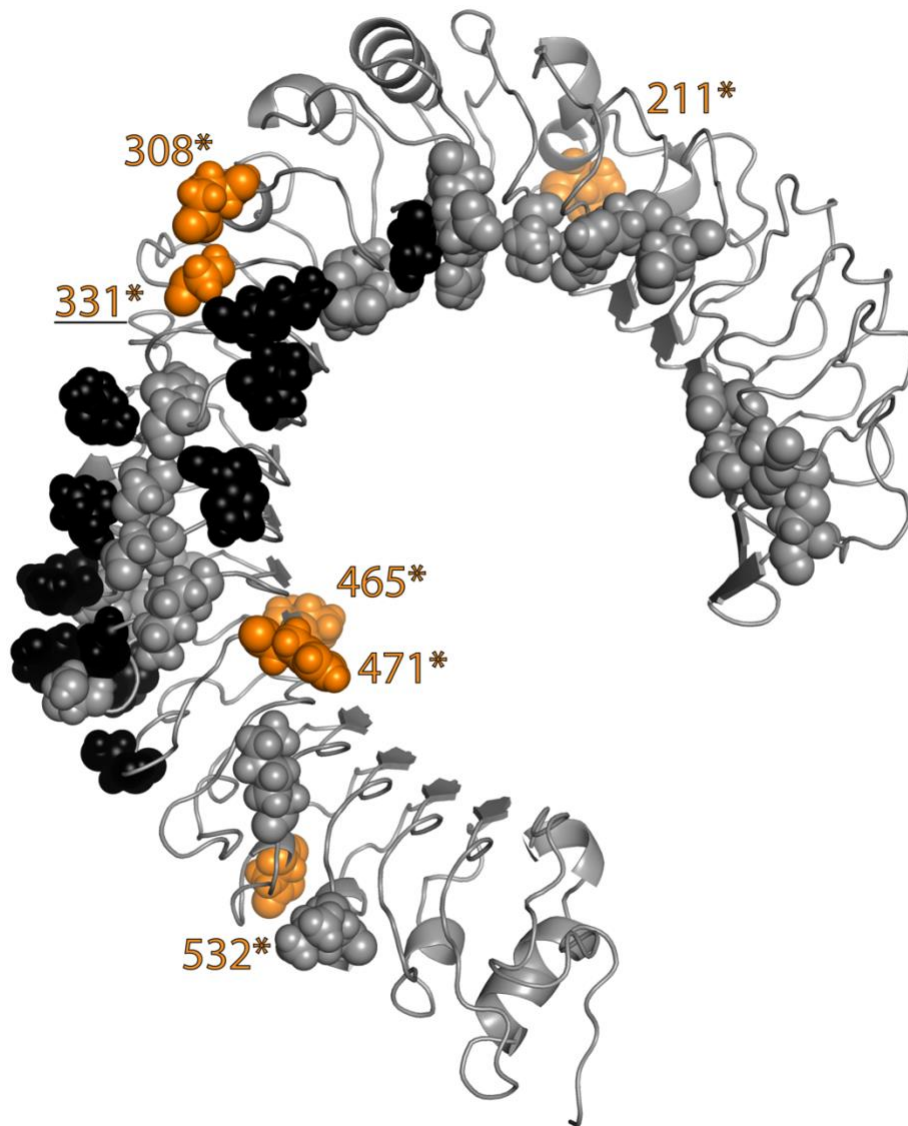

Supplementary Figure S1. Homology models of TLRs showing positions of positively selected sites. Legend is the same as Figure 4 of the main manuscript.

TLR5

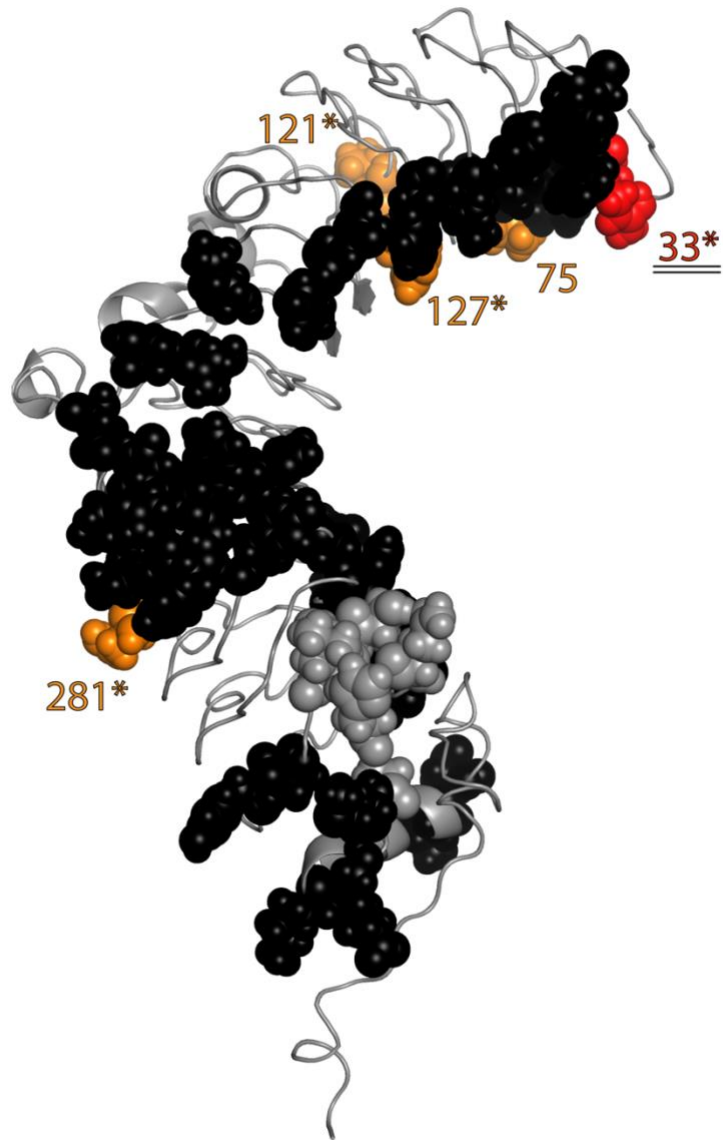

Supplementary Figure S1. Homology models of TLRs showing positions of positively selected sites. Legend is the same as Figure 4 of the main manuscript.

TLR7

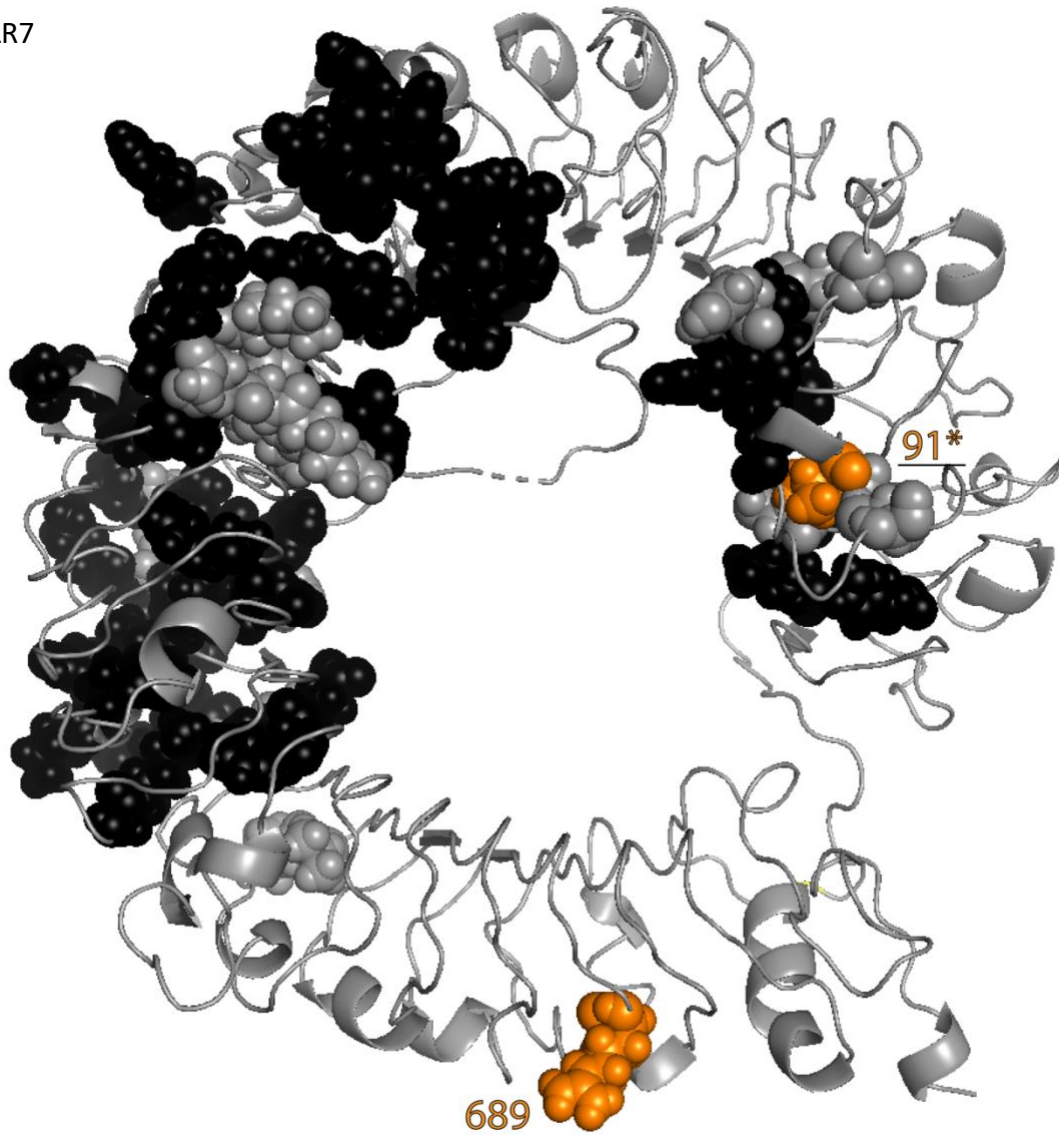

Supplementary Figure S1. Homology models of TLRs showing positions of positively selected sites. Legend is the same as Figure 4 of the main manuscript.

## Supplementary Information S2: Coverage depth of TLR15 loci relative to all known coding sequences

### Background

One explanation for the pseudogenization of TLR15 is that the gene underwent duplication, and one copy experienced functional redundancy and degradation in the genome. Even though this scenario does not fit well with TLR15 (there were several homozygous pseudogene haplotypes and we did not observe any triallelic sites at the locus), another method of detecting duplication is through analysis of read coverage of the locus.

### Methods

BAM files from analysis conducted in Pan, et al. (2019) were obtained for three penguin species (one non-*Eudyptes* spp. and two *Eudyptes* spp.: *Spheniscus humboldti*, *Eudyptes robustus*, *Eudyptes chrysocome*). Using coordinates derived from known coding sequences from Pan, et al. (2019), average depth of coverage was calculated for each region using samtools depth and awk. Using BLAST, the genomic position of the TLR15 locus was determined for each species and average coverage was determined for this region. Finally, average depth of coverage was plotted in a pairwise fashion between pairs of the three genomes.

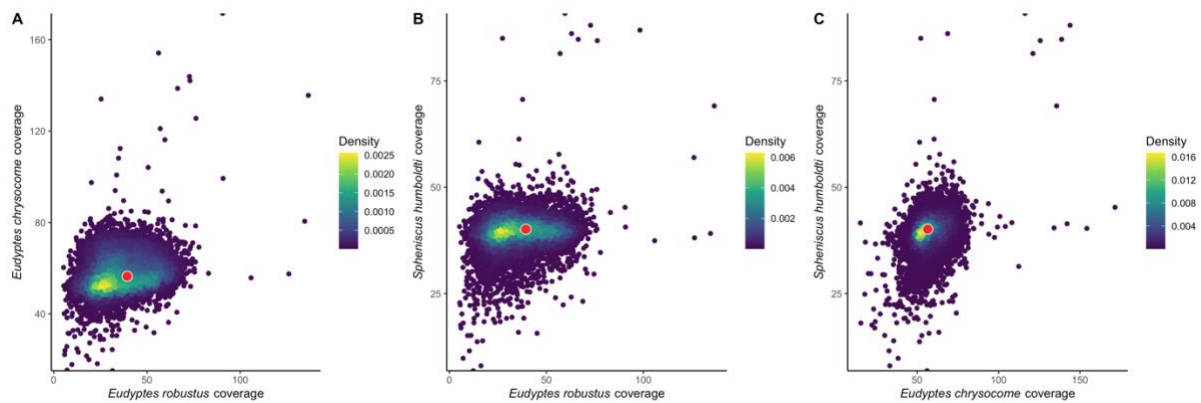

Figure S2: Pairwise depth of coverage of TLR15 and all other known coding sequences in the genomes of three penguin species. Depth of coverage for all coding loci are plotted (small points) and coloured according to their density. Depth of coverage for TLR15 is overlaid (red point).

### Results

In each pairwise comparison, depth of coverage for TLR15 lies well within the high-density cluster of coding loci in the genome.

### Interpretation

Since depth of coverage for TLR15 is comparable to the vast majority of coding sequences in the genome, it is highly likely that TLR15 has not undergone duplication in the *Eudyptes* lineage. This, along with the presence of homozygous mutations lack of triallelic sites, implies that TLR15 is a unitary pseudogene in the *Eudyptes* penguins.

### References

Pan HL, Cole TL, Bi XP, Fang MQ, Zhou CR, Yang ZT, Ksepka DT, Hart T, Bouzat JL, Argilla LS, et al. 2019. High-coverage genomes to elucidate the evolution of penguins. *Gigascience* 8.



| TLR | Model | lnL          | 2( $\Delta$ lnL) | p-value  |
|-----|-------|--------------|------------------|----------|
| 1A  | M1a   | -1821.206256 | 1.00E-06         | 1        |
| 1A  | M2a   | -1821.206255 |                  |          |
| 1A  | M7    | -1821.207512 | 0.00024          | 1        |
| 1A  | M8    | -1821.207272 |                  |          |
| 1B  | M1a   | -1335.556606 | 13.99            | 0.000918 |
| 1B  | M2a   | -1328.562989 |                  |          |
| 1B  | M7    | -1335.556601 | 13.99            | 0.000918 |
| 1B  | M8    | -1328.563326 |                  |          |
| 2A  | M1a   | -1063.044738 | 1.58             | 0.45     |
| 2A  | M2a   | -1062.25387  |                  |          |
| 2A  | M7    | -1063.061381 | 1.62             | 0.45     |
| 2A  | M8    | -1062.25387  |                  |          |
| 2B  | M1a   | -936.166981  | 3.97             | 0.14     |
| 2B  | M2a   | -934.166981  |                  |          |
| 2B  | M7    | -936.386588  | 4.41             | 0.11     |
| 2B  | M8    | -934.182354  |                  |          |
| 3   | M1a   | -4726.812656 | 4.043078         | 0.133    |
| 3   | M2a   | -4724.791117 |                  |          |
| 3   | M7    | -4726.81527  | 4.047772         | 0.132    |
| 3   | M8    | -4724.791384 |                  |          |
| 4   | M1a   | -4532.656932 | 14.015116        | 0.00091  |
| 4   | M2a   | -4525.649374 |                  |          |
| 4   | M7    | -4532.794629 | 14.29414         | 0.00079  |
| 4   | M8    | -4525.647559 |                  |          |
| 5   | M1a   | -4730.087159 | 24.504362        | 4.78E-06 |
| 5   | M2a   | -4717.834978 |                  |          |
| 5   | M7    | -4731.145327 | 26.619834        | 1.66E-06 |
| 5   | M8    | -4717.83541  |                  |          |
| 7   | M1a   | -5183.621165 | 7.169838         | 0.0277   |
| 7   | M2a   | -5180.036246 |                  |          |
| 7   | M7    | -5183.62674  | 7.16707          | 0.0278   |
| 7   | M8    | -5180.043205 |                  |          |
| 15  | M1a   | -4816.320022 | 7.523166         | 0.0233   |
| 15  | M2a   | -4812.558439 |                  |          |
| 15  | M7    | -4816.347303 | 7.545864         | 0.023    |
| 15  | M8    | -4812.574371 |                  |          |
| 21  | M1a   | -4313.32987  | 0.870012         | 0.647    |
| 21  | M2a   | -4312.894864 |                  |          |
| 21  | M7    | -4313.570862 | 1.346234         | 0.51     |
| 21  | M8    | -4312.897745 |                  |          |

**Supplementary Table S1.** Results from site models comparisons (M2/M2a and M7/M8) in the *codeml* program in PAML. Likelihood ratio tests were performed by calculating double the difference in log likelihood values between the alternative model (M2a or M8) and the null



model (M2 or M7). P values were obtained from the chi-squared distribution with 2 degrees of freedom (calculated in each case as the difference between the numbers of parameters included in each model). Comparisons with P values  $< 0.05$  were considered to be statistically significant, and are highlighted in green. Note that only the non-gene-converted regions of the TLR1/2 family were included in the analysis.

| TLR   | Site | AA | Pos. prob. | Omega | SE    | Domain | Chicken site | Chicken AA | Other study (ref) | Function                      | Function |
|-------|------|----|------------|-------|-------|--------|--------------|------------|-------------------|-------------------------------|----------|
| TLR1B | 39   | P  | 0.958      | 6.353 | 2.271 | ECD    | 43           | L          |                   |                               |          |
| TLR1B | 115  | N  | 0.923      | 6.117 | 2.452 | ECD    | 119          | K          | 1                 | <5Å lipopeptide binding       | 11       |
| TLR1B | 118  | T  | 0.927      | 6.15  | 2.429 | ECD    | 122          | I          | 1                 | <5Å lipopeptide binding       | 11       |
| TLR1B | 142  | D  | 0.946      | 6.276 | 2.335 | ECD    | 146          | N          | 2                 | <5Å lipopeptide binding       | 11       |
| TLR1B | 144  | K  | 0.999      | 6.592 | 2.004 | ECD    | 148          | V          | 1, 3              | <5Å lipopeptide binding       | 11       |
| TLR1B | 178  | I  | 0.926      | 6.141 | 2.435 | ECD    | 182          | I          |                   | <5Å lipopeptide binding       | 11       |
| TLR1B | 185  | A  | 0.94       | 6.237 | 2.366 | ECD    | 189          | A          |                   |                               |          |
| TLR1B | 201  | L  | 0.954      | 6.326 | 2.295 | ECD    | 205          | S          | 3, 4              | <5Å dimerization site         |          |
| TLR1B | 232  | T  | 0.935      | 6.2   | 2.394 | ECD    | 237          | F          |                   |                               |          |
| TLR2B | 232  | K  | 0.96       | 5.333 | 2.808 | ECD    | 230          | K          | 1                 |                               |          |
| TLR4  | 15   | L  | 0.916      | 4.631 | 1.482 | ECD    | 9            | P          | 1, 4              | Not modelled                  |          |
| TLR4  | 211  | A  | 0.978      | 4.872 | 1.142 | ECD    | 205          | T          | 3                 |                               |          |
| TLR4  | 308  | E  | 0.979      | 4.874 | 1.138 | ECD    | 302          | N          | 1, 3, 4, 5        |                               |          |
| TLR4  | 331  | E  | 0.922      | 4.656 | 1.453 | ECD    | 325          | E          | 3, 4, 6, 7, 8     | <5Å LPS and MD-2 dimerization | 12, 13   |
| TLR4  | 465  | V  | 0.901      | 4.57  | 1.546 | ECD    | 459          | I          | 3                 |                               |          |
| TLR4  | 471  | H  | 0.907      | 4.595 | 1.52  | ECD    | 465          | Y          |                   |                               |          |
| TLR4  | 532  | D  | 0.91       | 4.604 | 1.511 | ECD    | 526          | N          | 3, 6              |                               |          |
| TLR4  | 661  | V  | 0.905      | 4.585 | 1.531 | TMD    | 655          | G          | 1, 3              | Not modelled                  |          |
| TLR4  | 800  | R  | 0.903      | 4.576 | 1.54  | TIR    | 794          | R          |                   | Not modelled                  |          |
| TLR5  | 20   | C  | 0.902      | 4.72  | 1.541 | ECD    | 20           | C          | 1                 | Not modelled                  |          |
| TLR5  | 33   | L  | 0.985      | 5.068 | 1.033 | ECD    | 33           | M          | 1                 | FLA binding site (60)         | 14       |
| TLR5  | 75   | M  | 0.986      | 5.074 | 1.023 | ECD    | 75           | L          | 1                 |                               |          |
| TLR5  | 121  | Q  | 0.988      | 5.082 | 1.007 | ECD    | 121          | Q          | 1                 |                               |          |
| TLR5  | 127  | R  | 0.981      | 5.055 | 1.059 | ECD    | 127          | R          |                   |                               |          |
| TLR5  | 281  | D  | 0.977      | 5.037 | 1.092 | ECD    | 281          | T          | 1, 9, 10          |                               |          |
| TLR5  | 429  | H  | 0.918      | 4.789 | 1.465 | ECD    | 429          | H          |                   | Not modelled                  |          |
| TLR5  | 521  | R  | 0.987      | 5.079 | 1.012 | ECD    | 521          | Q          |                   | Not modelled                  |          |
| TLR5  | 660  | V  | 0.917      | 4.784 | 1.472 | TMD    | 660          | I          |                   | Not modelled                  |          |
| TLR5  | 827  | V  | 0.98       | 5.048 | 1.071 | TIR    | 827          | I          |                   | Not modelled                  |          |
| TLR5  | 845  | Q  | 0.93       | 4.84  | 1.403 | TIR    | 845          | Q          | 1                 | Not modelled                  |          |
| TLR7  | 91   | V  | 0.905      | 2.132 | 0.384 | ECD    | 101          | V          |                   | <5Å dimerization site         | 15       |

|       |     |   |       |       |       |     |     |   |      |              |
|-------|-----|---|-------|-------|-------|-----|-----|---|------|--------------|
| TLR7  | 689 | C | 0.901 | 2.127 | 0.391 | ECD | 699 | L | 3, 4 | Not modelled |
| TLR15 | 619 | V | 0.936 | 2.79  | 1.169 | ECD | 620 | I |      | Not modelled |

**Supplementary Table S2:** Locations of positively selected sites in penguin TLRs. In the final three columns, an indication is given as to whether the site has been identified as positively selected in other studies,

## References

- 1 Velova H, Gutowska-Ding MW, Burt DW, Vinkler M. 2018. Toll-Like Receptor Evolution in Birds: Gene Duplication, Pseudogenization, and Diversifying Selection. *Molecular Biology and Evolution* 35:2170-2184.
- 2 Huang, Y., Temperley, N.D., Ren, L., Smith, J., Li, N., Burt, D.W., 2011. Molecular evolution of the vertebrate TLR1 gene family - a complex history of gene duplication, gene conversion, positive selection and co-evolution. *Bmc Evol. Biol.* 11, 149. doi:10.1186/1471-2148-11-149
- 3 Wlasiuk, G., Nachman, M.W., 2010. Adaptation and Constraint at Toll-Like Receptors in Primates. *Mol. Biol. Evol.* 27, 2172–2186. doi:10.1093/molbev/msq104
- 4 Areal, H., Abrantes, J., Esteves, P.J., 2011. Signatures of positive selection in Toll-like receptor (TLR) genes in mammals. *Bmc Evol. Biol.* 11. doi:10.1186/1471-2148-11-368
- 5 Fornuskova, A., Vinkler, M., Pages, M., Galan, M., Jouselin, E., Cerqueira, F., Morand, S., Charbonnel, N., Bryja, J., Cosson, J.-F., 2013. Contrasted evolutionary histories of two Toll-like receptors (Tlr4 and Tlr7) in wild rodents (MURINAE). *BMC Evol. Biol.* 13.
- 6 Vinkler, M., Bryjova, A., Albrecht, T., Bryja, J., 2009. Identification of the first Toll-like receptor gene in passerine birds: TLR4 orthologue in zebra finch (*Taeniopygia guttata*). *Tissue Antigens* 74, 32–41. doi:10.1111/j.1399-0039.2009.01273.x
- 7 Nakajima, T., Ohtani, H., Satta, Y., Uno, Y., Akari, H., Ishida, T., Kimura, A., 2008. Natural selection in the TLR-related genes in the course of primate evolution. *Immunogenetics* 60, 727–735. doi:10.1007/s00251-008-0332-0
- 8 Shen, T., Xu, S., Wang, X., Yu, W., Zhou, K., Yang, G., 2012. Adaptive evolution and functional constraint at TLR4 during the secondary aquatic adaptation and diversification of cetaceans. *BMC Evol. Biol.* 12. doi:10.1186/1471-2148-12-39
- 9 Grueber, C.E., Wallis, G.P., Jamieson, I.G., 2014. Episodic Positive Selection in the Evolution of Avian Toll-Like Receptor Innate Immunity Genes. *Plos One* 9, e89632. doi:10.1371/journal.pone.0089632
- 10 Vinkler, M., Bainova, H., Bryja, J., 2014. Protein evolution of Toll-like receptors 4, 5 and 7 within Galloanserae birds. *Genet. Sel. Evol.* 46. doi:10.1186/s12711-014-0072-6
- 11 Jin, M.S., Kim, S.E., Heo, J.Y., Lee, M.E., Kim, H.M., Paik, S.-G., Lee, H., Lee, J.-O., 2007. Crystal structure of the TLR1-TLR2

- heterodimer induced by binding of a tri-acylated lipopeptide. *CELL* 130, 1071–1082. doi:10.1016/j.cell.2007.09.008
- 12 Paramo, T., Piggot, T.J., Bryant, C.E., Bond, P.J., 2013. The Structural Basis for Endotoxin-induced Allosteric Regulation of the Toll-like Receptor 4 (TLR4) Innate Immune Receptor. *J. Biol. Chem.* 288, 36215–36225. doi:10.1074/jbc.M113.501957
  - 13 Ohto, U., Yamakawa, N., Akashi-Takamura, S., Miyake, K., Shimizu, T., 2012b. Structural Analyses of Human Toll-like Receptor 4 Polymorphisms D299G and T399I. *J. Biol. Chem.* 287, 40611–40617. doi:10.1074/jbc.M112.404608
  - 15 Yoon, S., Kurnasov, O., Natarajan, V., Hong, M., Gudkov, A.V., Osterman, A.L., Wilson, I.A., 2012. Structural Basis of TLR5-Flagellin Recognition and Signaling. *Science* 335, 859–864. doi:10.1126/science.1215584

| TLR   | PAML selected site | MEME (P value) | FUBAR (posterior probability) |
|-------|--------------------|----------------|-------------------------------|
| TLR1B | 39                 | 0.67           | 0.49                          |
| TLR1B | 115                | 0.18           | 0.955                         |
| TLR1B | 118                | 0.17           | 0.959                         |
| TLR1B | 142                | 0.32           | 0.87                          |
| TLR1B | 144                | 0.08           | 0.984                         |
| TLR1B | 178                | 0.27           | 0.881                         |
| TLR1B | 185                | 0.21           | 0.886                         |
| TLR1B | 201                | 0.02           | 0.947                         |
| TLR1B | 232                | 0.2            | 0.899                         |
| TLR2B | 232                | 0.09           | 0.984                         |
| TLR4  | 15                 | 0.19           | 0.928                         |
| TLR4  | 211                | 0.17           | 0.964                         |
| TLR4  | 308                | 0.17           | 0.967                         |
| TLR4  | 331                | 0.21           | 0.94                          |
| TLR4  | 465                | 0.15           | 0.935                         |
| TLR4  | 471                | 0.23           | 0.927                         |
| TLR4  | 532                | 0.22           | 0.925                         |
| TLR4  | 661                | 0.27           | 0.902                         |
| TLR4  | 800                | 0.28           | 0.907                         |
| TLR5  | 20                 | 0.38           | 0.878                         |
| TLR5  | 33                 | 0.07           | 0.986                         |
| TLR5  | 75                 | 0.43           | 0.818                         |
| TLR5  | 121                | 0.05           | 0.99                          |
| TLR5  | 127                | 0.28           | 0.947                         |
| TLR5  | 281                | 0.32           | 0.924                         |
| TLR5  | 429                | 0.18           | 0.926                         |
| TLR5  | 521                | 0.1            | 0.979                         |
| TLR5  | 660                | 0.18           | 0.931                         |
| TLR5  | 827                | 0.19           | 0.964                         |
| TLR5  | 845                | 0.19           | 0.931                         |
| TLR7  | 91                 | 0.08           | 0.979                         |
| TLR7  | 689                | 0.28           | 0.953                         |
| TLR15 | 619                | 0.03           | 0.986                         |

Supplementary Table S3: Analysis of positively selected sites in penguin TLRs using different methods. Alignments used for PAML analysis were also used for MEME and FUBAR analysis and results of MEME and FUBAR analyses are given here with reference to sites that were found to be positively selected in PAML analysis. The significance threshold for MEME was taken to be the default  $P \leq 0.1$  and the significance threshold for FUBAR was taken to be the default posterior probability  $> 0.9$ . Significant sites in MEME and FUBAR analysis are shaded green.

| Sampling Location                       | Latitude Longitude |        | Sampled individuals (N) |                     |                    |                   |                      |                    |                    | TOTAL |                         |
|-----------------------------------------|--------------------|--------|-------------------------|---------------------|--------------------|-------------------|----------------------|--------------------|--------------------|-------|-------------------------|
|                                         |                    |        | <i>E. chrysolophus</i>  | <i>E. schlegeli</i> | <i>E. moseleyi</i> | <i>E. filholi</i> | <i>E. chrysocome</i> | <i>E. sclateri</i> | <i>E. robustus</i> |       | <i>E. pachyrhynchus</i> |
| Antipodes Islands                       | -49.69             | 178.77 |                         |                     |                    |                   |                      | 1                  |                    |       |                         |
| Amsterdam Island                        | -37.83             | 77.55  |                         |                     | 5, 1               |                   |                      |                    |                    |       |                         |
| Barnevelt Islands                       | -55.82             | -66.80 |                         |                     |                    |                   | 6, 1                 |                    |                    |       |                         |
| Bird Island, South Georgia              | -54.01             | -38.04 | 5                       |                     |                    |                   |                      |                    |                    |       |                         |
| Bouvet Island                           | -54.42             | 3.36   | 7                       |                     |                    |                   |                      |                    |                    |       |                         |
| Crozet Islands                          | -46.31             | 50.89  | 7                       |                     |                    | 7, 1              |                      |                    |                    |       |                         |
| Elephant Island, South Shetland Islands | -61.11             | -55.14 | 7                       |                     |                    |                   |                      |                    |                    |       |                         |
| Falkland/Malvinas Islands               | -51.77             | -59.50 |                         |                     |                    |                   | 8                    |                    |                    |       |                         |
| Harrison Cove, New Zealand              | -44.63             | 167.91 |                         |                     |                    |                   |                      |                    |                    |       | 1                       |
| Kerguelen Islands                       | -49.34             | 69.33  | 7                       |                     |                    | 7                 |                      |                    |                    |       |                         |
| Macquarie Island                        | -54.63             | 158.86 |                         | 6, 1                |                    | 7                 |                      |                    |                    |       |                         |
| Marion Island                           | -46.91             | 37.74  | 7, 1                    |                     |                    | 7                 |                      |                    |                    |       |                         |
| Nightingale Islands                     | -37.42             | -12.48 |                         |                     | 7                  |                   |                      |                    |                    |       |                         |
| The Snares, New Zealand                 | -48.03             | 166.60 |                         |                     |                    |                   |                      |                    | 1                  |       |                         |
| Terhalten Island, Tierra del Fuego      | -55.45             | -67.06 |                         |                     |                    |                   | 7                    |                    |                    |       |                         |
| TOTAL by species                        |                    |        | 41                      | 7                   | 13                 | 29                | 22                   | 1                  | 1                  | 1     | 115                     |

References:

 Vianna JA, Fernandes FAN, Frugone MJ, Figueiró HV, Pertierra LR, Noll D, Bi K, Wang-Claypool CY, Lowther A, Parker P, et al. 2020. Genome-wide analyses reveal drivers of penguin diversification. Proc Natl Acad Sci U S A 117(12):3481-3486.

 Pan, et al. 2019. High-coverage genomes to elucidate the evolution of penguins. GigaScience 8(9) giz117, <https://doi.org/10.1093/gigascience/giz117>

**Supplementary Table S4.** Locations of samples used in this study. Reference genomes from Pan, et al. (2019) were used for the positive selection analyses, while genomic data from Vianna, et al. (2020) and unpublished data were used for the TLR15 population-level analysis. Since these sources of data used different sequencing technologies and assembly pipelines, only data from Vianna et al. were used for the TLR15 analysis, rather than a combined dataset. All data used in the analysis are available and details of accession numbers can be found in the 'Data Availability' section of the Main Text.

Supplementary Material – Identification of putative loss-of-function mutations in *Eudyptes* TLR15.

Including Supplementary Tables S5-S7 and Supplementary Figure S3

Alignment of intact *Eudyptes* TLR15 haplotypes with other birds

TLR15 protein sequences were downloaded from Ensembl or NCBI (chicken, ENSGALP00000013260; northern fulmar, XP\_009585200.1, misannotated as TLR2; emu, ENSDNVP00000009442; blue tit, ENSCCEP00000009931; collared flycatcher, ENSFALP00000015961; helmeted guineafowl, ENSNMEP00000012998). These were aligned to TLR15 sequences from other penguins (n=11) and intact *Eudyptes* haplotypes (n=45, including the consensus TLR15 used in functional analysis). Next, residues were identified which are well conserved among penguins and other birds, but that are distinct in *Eudyptes* TLR15. These sites are presented in **Table S5**.

| Amino acid site (relative to alignment) | Amino acid site (relative to chicken*) | Ancestral amino acid (consensus) | Derived ( <i>Eudyptes</i> ) amino acid | Chicken nuc. site coordinates |
|-----------------------------------------|----------------------------------------|----------------------------------|----------------------------------------|-------------------------------|
| 56                                      | 55                                     | T                                | M                                      | 3:3024305                     |
| 68                                      | 67                                     | E                                | G                                      | 3:3024269                     |
| 161                                     | 160                                    | L                                | P                                      | 3:3023990                     |
| 246                                     | 239                                    | I                                | V                                      | 3:3023754                     |
| 569                                     | 560                                    | R/P/N                            | H                                      | 3:3022790                     |
| 674                                     | 665                                    | I/G/V                            | V                                      | 3:3022476                     |
| 679                                     | 670                                    | V/A                              | A                                      | 3:3022448                     |
| 683                                     | 674                                    | L                                | S                                      | 3:3022289                     |
| 736                                     | 727                                    | K/E                              | G                                      | 3:3022173                     |
| 787                                     | 778                                    | Q                                | R                                      | 3:3022136                     |

**Table S5.** Amino acid and nucleotide positions of positions which are conserved among penguins and other birds, but are distinct in the *Eudyptes*. Red text indicates that the position is highly conserved across the whole of vertebrates (see **Figure S3**). \*The extra intron-spanning methionine at the start of chicken TLR15 was removed prior to alignment.

Next, the variant positions were plotted against the conservation scores of TLR15 across 77 vertebrate genomes (data obtained from UCSC; **Figure S3**). Amino acid sites 161, 736 and 787 are highly conserved across vertebrates, but are different in *Eudyptes*, which could be indicative of a change in function. The mechanism of TLR15 activation has not been elucidated, so it is unclear which of these polymorphisms is the loss-of-function mutation, or whether multiple mutations resulted in the phenotype.



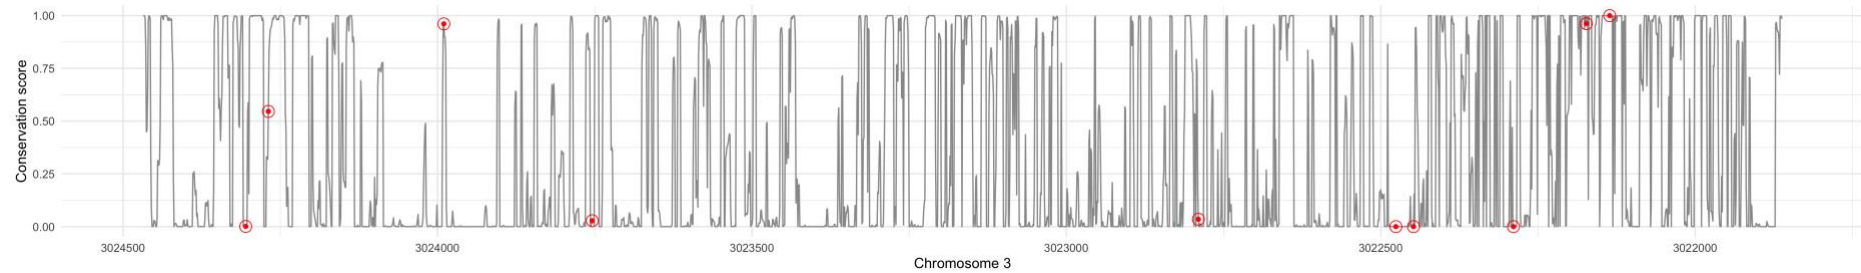

**Figure S3.** Per-nucleotide conservation scores for *TLR15* in chicken compared to 77 other vertebrate genomes (data obtained from UCSC). Sites that were identified as being distinct in *Eudyptes* compared to the rest of penguins are highlighted in red.

Next, variants found in the *Eudyptes* were used to replace equivalent residues in the chicken *TLR15* sequence, and the functional consequences predicted using Provean and SIFT. Provean analysis predicted L161P (chicken residue 160) and L683S (chicken residue 674) to be deleterious changes (**Table S6**), while SIFT also predicted L683S to be a deleterious change (**Table S7**). SIFT also predicted deleterious effects for T56M (chicken residue 55) and E68G (chicken residue 67), but since so few sequences were included as comparators for these sites, the prediction is of low confidence.

| Variant | PROVEAN score | Prediction (cutoff= -2.5) |
|---------|---------------|---------------------------|
| T55M    | -1.630        | Neutral                   |
| E67G    | -1.484        | Neutral                   |
| L160P   | -2.555        | Deleterious               |
| I239V   | -0.236        | Neutral                   |
| R560H   | -0.010        | Neutral                   |
| I665V   | -0.300        | Neutral                   |

|       |        |             |
|-------|--------|-------------|
| V670A | -0.668 | Neutral     |
| L674S | -4.235 | Deleterious |
| K727G | -1.862 | Neutral     |
| E727G | -1.749 | Neutral     |
| Q778R | 0.337  | Neutral     |

**Table S6.** Provean predictions for changes in TLR15 protein function. The chicken TLR15 sequence was modified with the indicated changes (sites are equivalent to the sites described in Table S5 for the *Eudyptes* penguins).

| Variant | Median seq. conservation | Sequences represented | Function affected score | Outcome                 | Notes          |
|---------|--------------------------|-----------------------|-------------------------|-------------------------|----------------|
| T55M    | 4.32                     | 1                     | 0.00                    | AFFECT PROTEIN FUNCTION | LOW CONFIDENCE |
| E67G    | 3.44                     | 2                     | 0.01                    | AFFECT PROTEIN FUNCTION | LOW CONFIDENCE |
| L160P   | 3.44                     | 2                     | 0.06                    | TOLERATED               |                |
| I239V   | 3.34                     | 4                     | 0.57                    | TOLERATED               |                |
| R560H   | 3.14                     | 46                    | 0.13                    | TOLERATED               |                |
| I665V   | 3.03                     | 48                    | 1.00                    | TOLERATED               |                |
| V670A   | 3.03                     | 48                    | 0.22                    | TOLERATED               |                |
| L674S   | 3.09                     | 47                    | 0.00                    | AFFECT PROTEIN FUNCTION |                |
| K727G   | 3.03                     | 48                    | 0.07                    | TOLERATED               |                |

**Table S7.** SIFT predictions for changes in TLR15 protein function. As above, the chicken TLR15 sequence was modified with the indicated changes. Sites where SIFT indicated low confidence in predictions are indicated in 'Notes'.

In summary, analysis of nucleotide conservation scores indicates that three non-synonymous variants in the *Eudyptes* (amino acid sites 161, 736 and 787) are otherwise highly conserved across vertebrates. This could be evidence of putative change in function at these sites. Moreover, Provean analysis predicts that

L161P is a deleterious change, which is consistent with a loss-of-function mutation. Continued work to elucidate the mechanism of action of TLR15 could provide insight into which mutations are the cause of the loss-of-function of *Eudypetes* TLR15.

|              | Mutation |       |       |        |        |        |           | Overall* | Total (N) in sp. |
|--------------|----------|-------|-------|--------|--------|--------|-----------|----------|------------------|
|              | C143G    | C185A | 681+A | 1391+? | 1826+T | 1996+T | 2273+31bp |          |                  |
| chrysocome   | 0.048    | 0.333 | 0.024 | 0.048  | 0.524  | 0.000  | 0.024     | 0.714    | 42               |
| chrysolophus | 0.000    | 0.350 | 0.000 | 0.000  | 0.375  | 0.025  | 0.463     | 0.763    | 80               |
| filholi      | 0.321    | 0.089 | 0.000 | 0.054  | 0.446  | 0.018  | 0.000     | 0.750    | 56               |
| moseleyi     | 0.000    | 0.000 | 0.000 | 0.000  | 0.000  | 0.542  | 0.000     | 0.542    | 24               |
| schlegeli    | 0.000    | 0.417 | 0.000 | 0.000  | 0.417  | 0.000  | 0.583     | 0.917    | 12               |

\*proportion of pseudogenised haplotypes (any causal mutation)

Supplementary Table S8. Frequencies of each pseudogene mutation in population analysis.
